# Supplementary material
Source: publisher site journal article supplement (https://www.dovepress.com/article/322965)
Supplement: Supplementary file 1 [file get_supplementary_file.php]

Appendix A: Baseline questionnaire

1) How confident are you in identifying the anatomy relating to nasal fractures (0-10)?

0 1 2 3 4 5 6 7 8 9 10

Not at all Completely confident

2) How confident do you feel knowing which questions need to be asked when dealing with a nasal fracture (0-10)?

0 1 2 3 4 5 6 7 8 9 10

Not at all Completely confident

3) How confident do you feel examining a nasal fracture (0-10)?

0 1 2 3 4 5 6 7 8 9 10

Not at all Completely confident

4) How confident do you feel in being able to assess and recognize complications related to nasal fractures? (0-10)?

0 1 2 3 4 5 6 7 8 9 10

Not at all Completely confident

5) How confident would you be to perform the procedure of a manipulation of a nasal fracture under local anaesthetic on your own?

0 1 2 3 4 5 6 7 8 9 10

Not at all Completely confident
